# Supplementary material for: Positive Feedback Regulation of Circular RNA Hsa_circ_0000566 and HIF-1α promotes Osteosarcoma Progression and Glycolysis Metabolism
Source: PubMed Central journal article supplement (PMC10017158; doi:10.14336/ad.2022.0826), 2023-04-01
Supplement: AD-14-2-529-s.pdf [file AD-14-2-529-s.pdf]

## SUPPLEMENTARY DATA

# **Positive Feedback Regulation of Circular RNA Hsa\_circ\_0000566 and HIF-1 $\alpha$ promotes Osteosarcoma Progression and Glycolysis Metabolism**

**Shuying Shen<sup>1,2</sup> #, Yining Xu<sup>1,2</sup> #, Zhe Gong<sup>1,2</sup> #, Teng Yao<sup>1,2</sup> #, Di Qiao<sup>1,2</sup>, Yizhen Huang<sup>1,2</sup>, Zhenlei Zhang<sup>1,2</sup>, Jun Gao<sup>1,2</sup>, Haonan Ni<sup>3</sup>, Zhanping Jin<sup>4</sup>, Yingchun Zhu<sup>4</sup>, Hongfei Wu<sup>5</sup>, Qingxin Wang<sup>5</sup>, Xiangqian Fang<sup>1,2</sup>\*, Kangmao Huang<sup>1,2</sup>\*, Jianjun Ma<sup>1,2</sup>\***

# SUPPLEMENTARY DATA

**Supplementary Table 1.** The primers used in the Quantitative real-time PCR.

| Name             | Sequence (5'→ 3')         |
|------------------|---------------------------|
| Hsa_circ_0006430 |                           |
| Forward          | ACAGTGACAGGGGATCATCG      |
| Reverse          | AGGGAGCGTTTCCAATCCAA      |
| Hsa_circ_0098199 |                           |
| Forward          | CTCTGCTGTGAGGGCAACTC      |
| Reverse          | CAAAGCTGATGAGCCAGGGT      |
| Hsa_circ_0000566 |                           |
| Forward          | TAGGAAGTAAGGATGATGGC      |
| Reverse          | CACGAGGCATTTTCACTTGT      |
| Hsa_circ_0005211 |                           |
| Forward          | CCCCGAGTCTGGTAAAGCATC     |
| Reverse          | GGTCAGAATGGCATAACCTCTGT   |
| Hsa_circ_0036649 |                           |
| Forward          | GATTGGACATTTTCACTAGAAAGGC |
| Reverse          | CCCGTTCCTCACCCTGAAT       |
| Hsa_circ_0002599 |                           |
| Forward          | TTCACTGAAGCCCCTCCG        |
| Reverse          | CCGCACTTCCAGTTCTCTCT      |
| Hsa_circ_0047378 |                           |
| Forward          | AGTGTCCCCTGTGTCAAGAATC    |
| Reverse          | TTCTACAGAAACACAGGAATATCT  |
| Hsa_circ_0007509 |                           |
| Forward          | CACGTTCGAAAGGTCTGTGC      |
| Reverse          | AAACTCCGGGCCACCATTGT      |
| Hsa_circ_0008821 |                           |
| Forward          | CCTCTCAGATATTAGGACTGGG    |
| Reverse          | CAGCAGTGTCCCAGATGAGG      |
| Hsa_circ_0050334 |                           |
| Forward          | CCGGAAGAAGCTGGTCACT       |
| Reverse          | ATCAGGCAAGGTGCTGAGTC      |
| Hsa_circ_0003810 |                           |
| Forward          | CCACCCAGCATTGGTGAAGT      |
| Reverse          | TTGTACTCCAGGAACACTTTGAG   |
| Hsa_circ_0005762 |                           |
| Forward          | TGGAGGGTATGGTCAGTTGG      |
| Reverse          | TCGAGACCCCAAGCATAAC       |
| Hsa_circ_0000633 |                           |
| Forward          | CGGCACAACCTCTTGGTCTC      |
| Reverse          | CCATTATGGAAAGGCCGGGT      |
| Hsa_circ_0007287 |                           |
| Forward          | AGACAGAGCACGAAAGGCAT      |
| Reverse          | CATGGCTGGCATTTCCTCAAC     |
| Hsa_circ_0000741 |                           |
| Forward          | TCCTCGCATGATTGTCACCC      |
| Reverse          | TTCCACCCGCTCCAGGAAG       |
| Hsa_circ_0050461 |                           |
| Forward          | TATCAACCAGGCCTTTGCCA      |
| Reverse          | AAGAGCTTCCAGCTACTTGTCT    |
| Hsa_circ_0004594 |                           |
| Forward          | GGGTACGCTGGCTTCATCAT      |
| Reverse          | ACGGTGCACCCGCCG           |
| Hsa_circ_0007935 |                           |
| Forward          | CAGTAATGAACACTGGGCAGC     |
| Reverse          | TTGCAAGCTTCATGCAATGGT     |
| Hsa_circ_0005762 |                           |
| Forward          | ATATGTCTGTCAGGATAGAGATTCC |
| Reverse          | TTACCATGCTCTGTCGCTGG      |
| Hsa_circ_0007291 |                           |

# SUPPLEMENTARY DATA

|                  |                          |
|------------------|--------------------------|
| Forward          | CTCAATGGCGGTATGTGGGT     |
| Reverse          | TGTCTCTCAGCACGTGGTTC     |
| Hsa_circ_0127512 |                          |
| Forward          | ACGACCCAGGTTGGTTGAAG     |
| Reverse          | AGAGCTGGCCCTATATTATTTTCC |
| GAPDH            |                          |
| Forward          | TCAAGATCATCAGCAATGCC     |
| Reverse          | CGATACCAAAGTTGTCATGGA    |
| Beta Actin       |                          |
| Forward          | CATGTACGTTGCTATCCAGGC    |
| Reverse          | CTCCTTAATGTCACGCACGAT    |
| U6               |                          |
| Forward          | CTCGCTTCGCRCAGCACA       |
| Reverse          | AACGCTTCACGAATTTGCGT     |
| HIF-1 $\alpha$   |                          |
| Forward          | GAACGTCGAAAAGAAAAGTCTCG  |
| Reverse          | CCTTATCAAGATGCGAACTCACA  |
| VHL              |                          |
| Forward          | GCAGGCGTCGAAGAGTACG      |
| Reverse          | CGGACTGCGATTGCAGAAGA     |
| LDHA             |                          |
| Forward          | ATGGCAACTCTAAAGGATCAGC   |
| Reverse          | CCAACCCCAACAACCTGTAATCT  |
| PDK1             |                          |
| Forward          | CTGTGATACGGATCAGAAACCG   |
| Reverse          | TCCACCAAACAATAAAGAGTGCT  |
| PDK4             |                          |
| Forward          | GGAGCATTTCTCGCGCTACA     |
| Reverse          | ACAGGCAATTCTTGTCGCAA     |
| GLUT1            |                          |
| Forward          | GGCCAAGAGTGTGCTAAAGAA    |
| Reverse          | ACAGCGTTGATGCCAGACAG     |
| GLUT4            |                          |
| Forward          | TGGGCGGCATGATTTCTCTC     |
| Reverse          | GCCAGGACATTGTTGACCAG     |

**Supplementary Table 2.1.** Clinical features of Osteosarcoma applied in experiments.

| Features                                 | No. of cases |
|------------------------------------------|--------------|
| <b>Age at diagnosis</b>                  |              |
| <18                                      | 8            |
| $\geq$ 18                                | 4            |
| <b>Gender</b>                            |              |
| Male                                     | 6            |
| Female                                   | 6            |
| <b>Clinical classification</b>           |              |
| Osteosarcoma                             | 8            |
| Osteosarcoma of extraosseous soft tissue | 1            |
| Parosteal Osteosaroma                    | 1            |
| <b>Distant metastasis</b>                |              |
| Absent                                   | 3            |
| Present                                  | 9            |
| <b>Tumour size (cm)</b>                  |              |
| <5cm                                     | 4            |
| >5cm                                     | 6            |

# SUPPLEMENTARY DATA

**Supplementary Table 2.2.** Clinical features of Chondroma applied in experiments.

| <b>Features</b>                | <b>No. of cases</b> |
|--------------------------------|---------------------|
| <b>Age at diagnosis</b>        |                     |
| <18                            | 5                   |
| ≥18                            | 7                   |
| <b>Gender</b>                  |                     |
| Male                           | 7                   |
| Female                         | 5                   |
| <b>Clinical classification</b> |                     |
| enchondroma                    | 8                   |
| periosteal chondrolila         | 4                   |
| <b>Distant metastasis</b>      |                     |
| Absent                         | 12                  |
| Present                        | 0                   |
| <b>Tumour size (cm)</b>        |                     |
| <5cm                           | 4                   |
| >5cm                           | 6                   |

Statement: our project was authorized by the Ethics Committee of the Sir Run Run Shaw Hospital. The ethic number was 20210218-30.

# SUPPLEMENTARY DATA

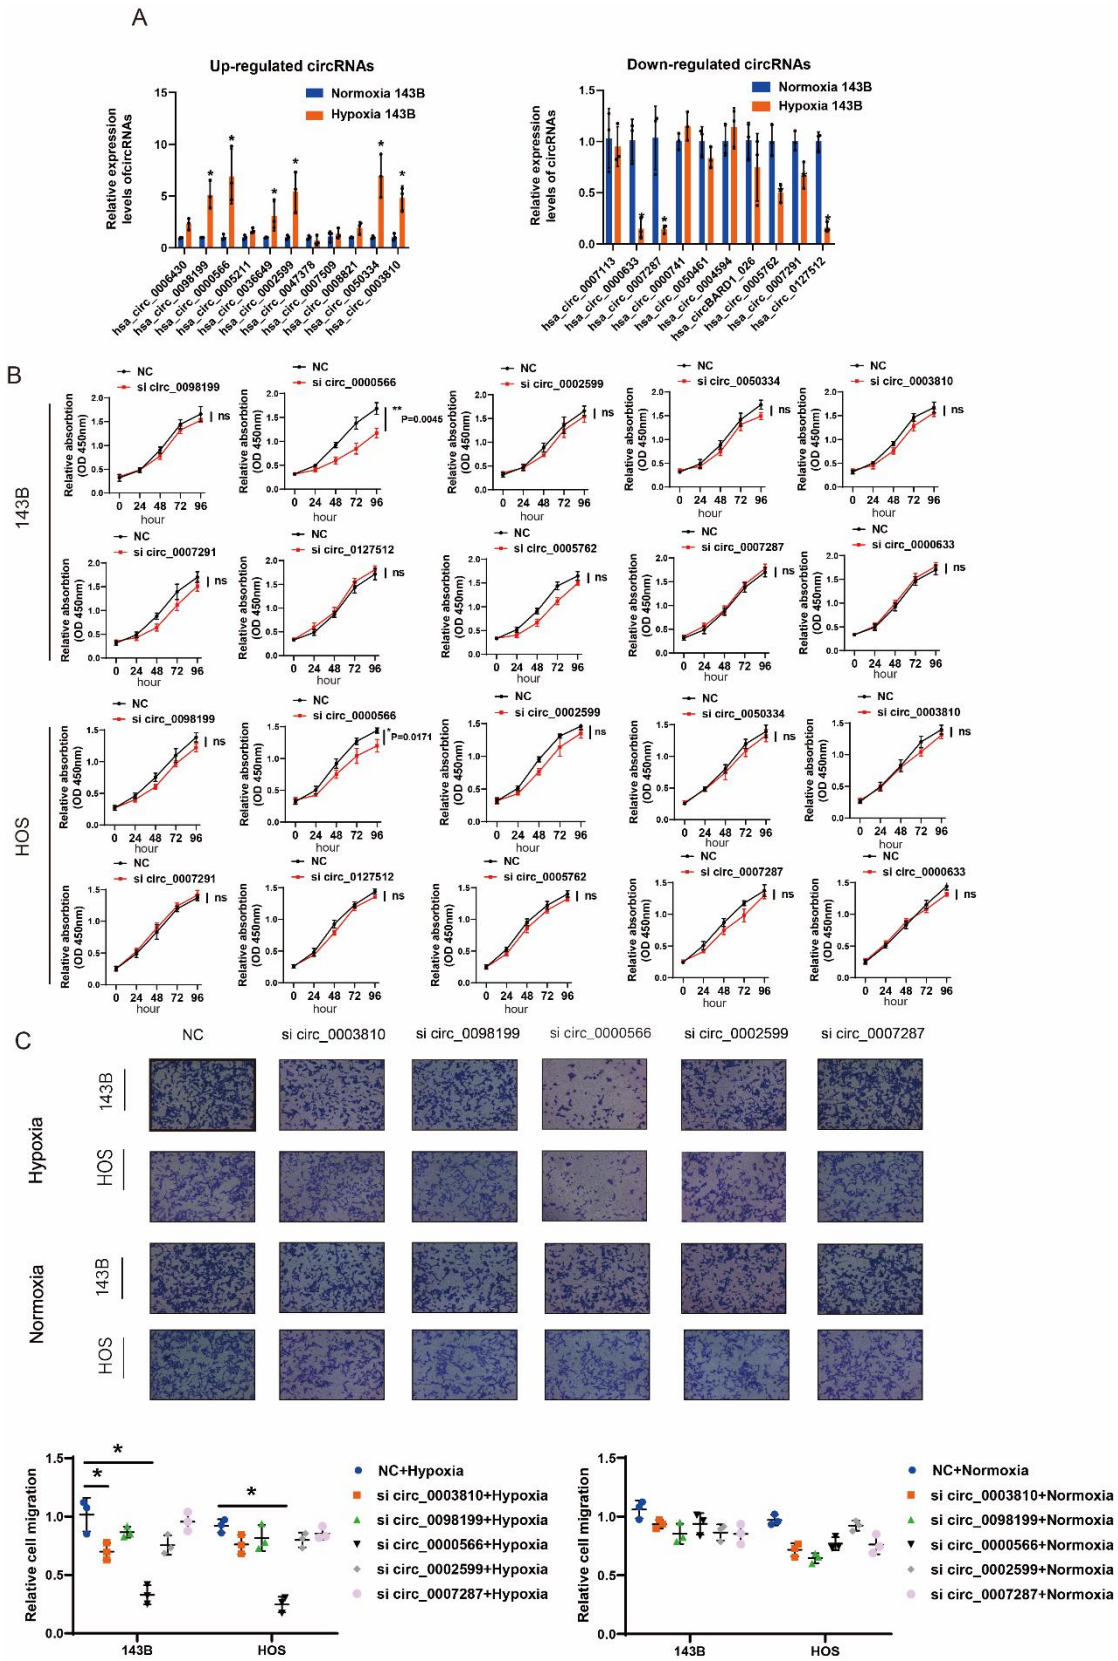

# SUPPLEMENTARY DATA

D

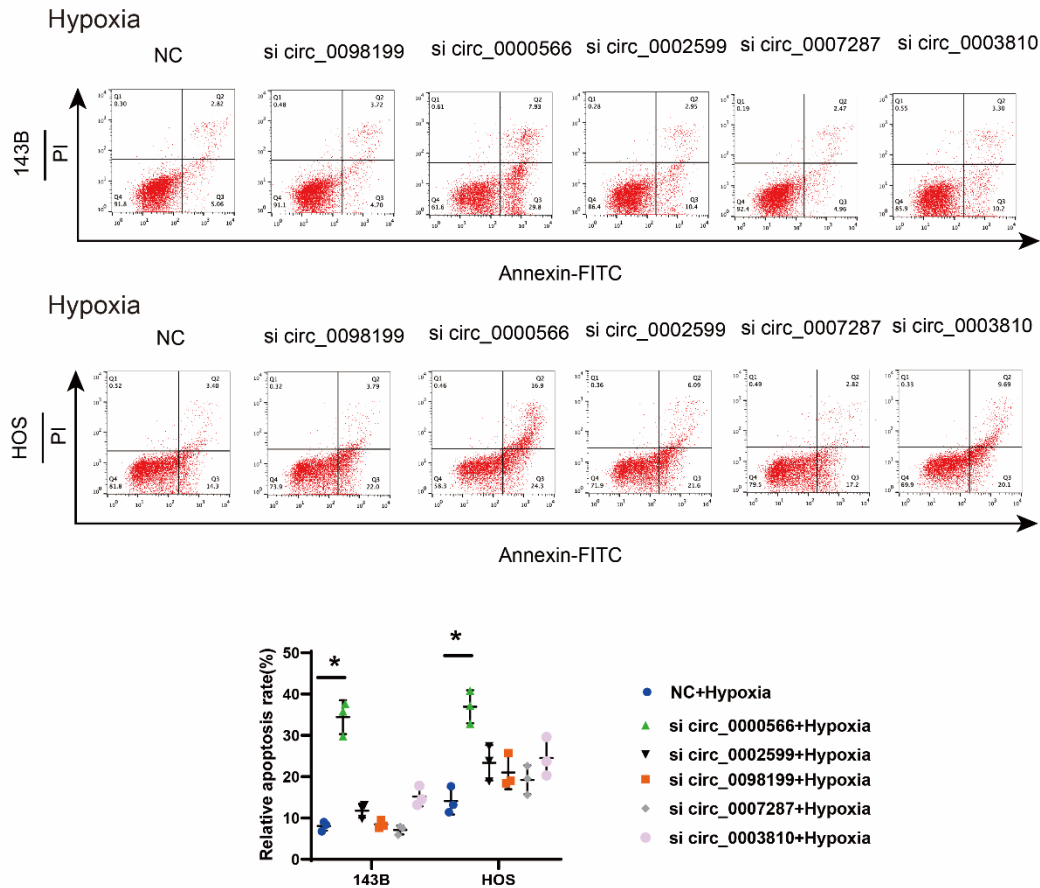

**Supplementary Figure S1. The hypoxia-response circRNAs selection in vitro.** (A) Five upregulated and five downregulated circRNAs were selected using qRT-PCR. Data were shown as mean  $\pm$  SD. \* $p < 0.05$ . (n=3). (B) CCK-8 assays were performed to detect the effect of circRNAs in OS cells. Data were shown as mean  $\pm$  SD. Ns represents no sense. \* $p < 0.05$ . (n=3). (C) Transwell migration experiment was employed to examine the impact of candidate circRNAs on OS cells. Data were shown as mean  $\pm$  SD. \* $p < 0.05$ . (n=3). (D) Flow cytometry analysis was employed to pick out functional and hypoxia-response circRNAs from candidate circRNAs. Data were shown as mean  $\pm$  SD. \* $p < 0.05$ . (n=3).

# SUPPLEMENTARY DATA

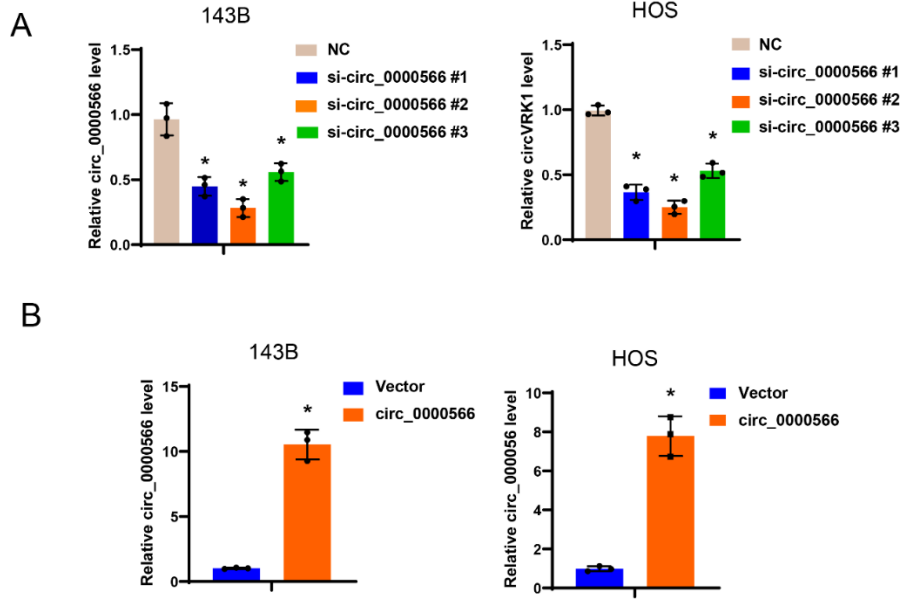

**Supplementary Figure S2. The knockdown efficiency of hsa\_circ\_0000566.** (A) The expression levels of hsa\_circ\_0000566 in 143B and HOS cells treated by transfection of hsa\_circ\_0000566 silencing or control siRNAs were assessed by qRT-PCR. Data were shown as mean  $\pm$  SD. \* $p < 0.05$ . (n=3). (B) The expression levels of hsa\_circ\_0000566 in 143B and HOS cells treated by transfection of hsa\_circ\_0000566 overexpression or vector. were assessed by qRT-PCR. Data were shown as mean  $\pm$  SD. \* $p < 0.05$ . (n=3).

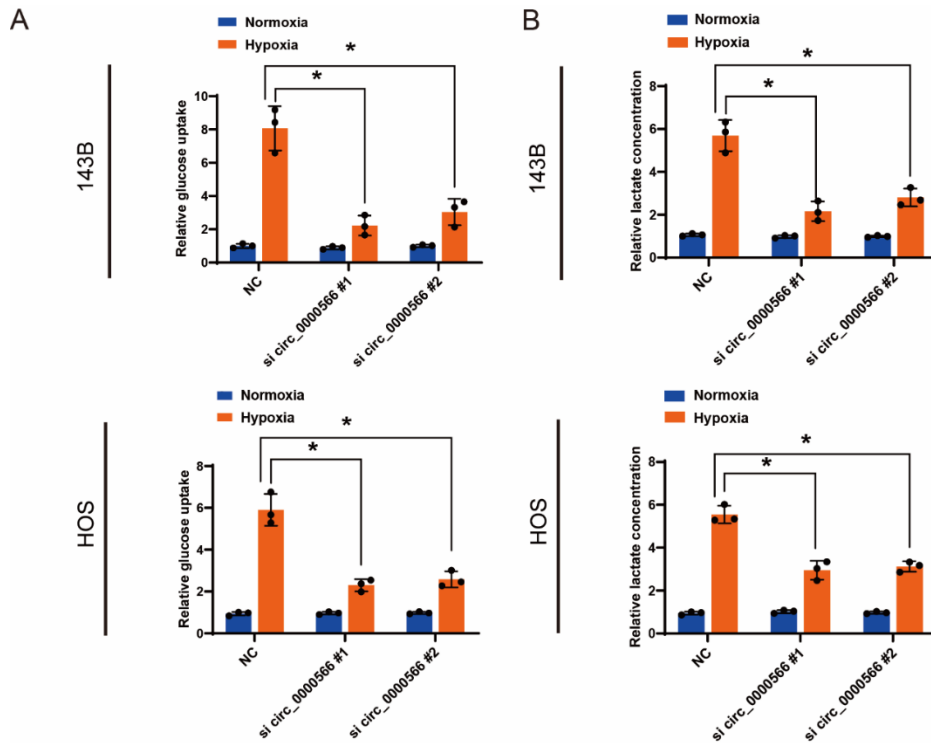

**Supplementary Figure 3. Hsa\_circ\_0000566 promotes glycolysis in osteosarcoma.** (A) The glucose uptake in 143B and HOS cells treated by transfection of hsa\_circ\_0000566 silencing or control siRNAs were assessed. Data were shown as mean  $\pm$  SD. \* $p < 0.05$ . (n=3). (B) The lactate production of 143B and HOS cells treated by transfection of hsa\_circ\_0000566 overexpression or silencing or control siRNAs were assessed. Data were shown as mean  $\pm$  SD. \* $p < 0.05$ . (n=3).

SUPPLEMENTARY DATA

A

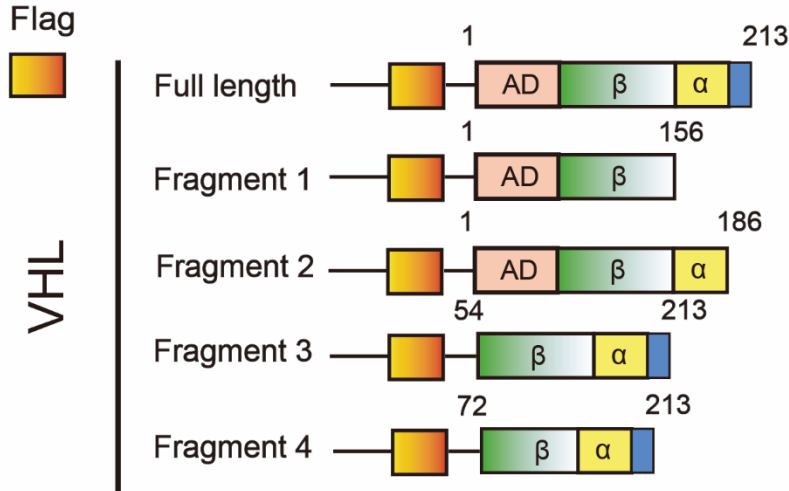

B

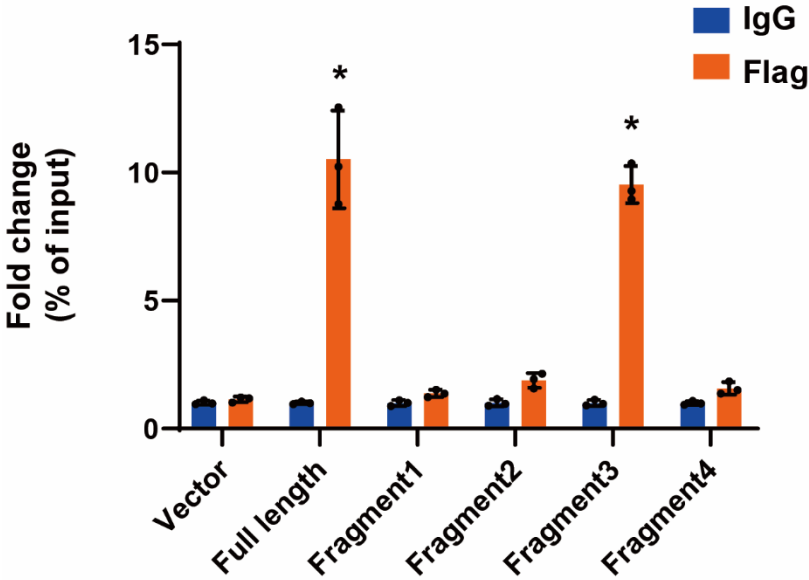

Supplementary Figure 4. Deletion mutant experiment of VHL. (A) A schematic of full length and deletion mutants of VHL. (B) RIP experiment was used to verify specific VHL regions interacting with hsa\_circ\_0000566. Results are reported as mean  $\pm$  SD, \* $p < 0.05$ ,  $n = 3$ .



# SUPPLEMENTARY DATA

A

HRE1

ACACCTGAGGGCACTTGAAGCCCAGTGTGAAGTGAAGTACTGATCAAGATTAC  
CCAACCAGCTGGTGTGCATACCTGCAATCCAGGTCTTTTGATTCCAGTCAG  
TACTCTTTTACAATAAAACACTGCTTTCTCTGAATGTTATGTTAACTT  
ATGTGTCAGTGAGAAAAATGAATCAAGATTCATCTCCTAAAGGATAGCTA  
ATGGGAAAGAAAGCTTAGGAATTCTGGGTGTACCAGCCTTGCCCAGATG  
ATTAAGCCACAGTTTTTCTGTCACTCTTCAAAGTTGTGCTCCTTCCTCA  
CAGTGACTTCCATAATTGTGGAGCATGTTGGTGAGGTCTTGGAGCCAGGT  
GGTCACCGGTGCAATTTTCTGTTGTTCCACCACTTACCAGCTTGCTGAGC  
CTTAGTTTCTCGAAATGGAGGTGATAATGTAATCTTACAGAGTCATGA  
GGATGGATGGGAACCTGTGTAAGCATTACTAGCATGTCCCGGGAACCT  
TTGCCCTTCCCCTTGTGCTCAGTTGCCTTATGTTTTCAATCTCTGCACT  
GTGTTCTATCATATCGGTATTGACCTTAATAAACTCTTATTTTGTTCCT  
ATAAAATGTGCATTCTAATTGGATGCACCTTTCCTC

HRE2

GTGAAATGCCTCGTGTAAGCAGCTCAAGCTGGAAGACAGAGCTCTGC  
AAAGAGACATCTTGCAGAACAATTTGCAGTTGGAGAGATAATAACTGACA  
TGGCAAAAAGGAATGGAAAGTAGGATTACCCATTGGCCAAGGAGGCTTT  
GGCTGTATATCTTGGTAAAGTGTGACTGCTTCTAATGATCAATCCAA  
AGATTTATATGTTTTCTTATGAAATGGTTTCTCATTATGAGCTGTTAT  
GGGATGTTCCATAAATCTGCAGTCACTTAATAGTTTCTGATTAAGCAA  
AAATGCATCTCTGACGTAGGAGTGGAAATTGTTAATGCAGTCACAACAGA  
AAAGGAGGATAAAATAGCTGTAATACTATCATTAGTGAGCACTAGGACTT  
TAGATTTTAAAGATACTTTATATAATCTTAATCTCTTTTGAGACCCAAAG  
AAACCCATTTACGTATCTTCCCCTCCCACCTCCACCTATGTGGGATTTA  
TTCCCTCCGTGTT

B

HRE2 MUT1

(CGTG → AAAA)

HRE2 WT

...ATGCCT**CGTG**TAAAAG...

HRE2 MUT1

...ATGCCT**AAAA**TAAAAG...

HRE2 MUT2

(CGTA → AAAA)

HRE2 WT

...CTCTGAC**CGTA**GGAGTGG...

HRE2 MUT2

...CTCTGA**AAAA**GGAGTGG...

**Supplementary Figure 5. The combination of HIF-1 $\alpha$  and hsa\_circ\_0000566.** Prediction of the binding position of HIF-1 $\alpha$  to the hsa\_circ\_0000566 (JASPAR). Hsa\_circ\_0000566 sequence labeling HIF-1 $\alpha$ -binding site (blue) and the mutated nucleotides (red).

# SUPPLEMENTARY DATA

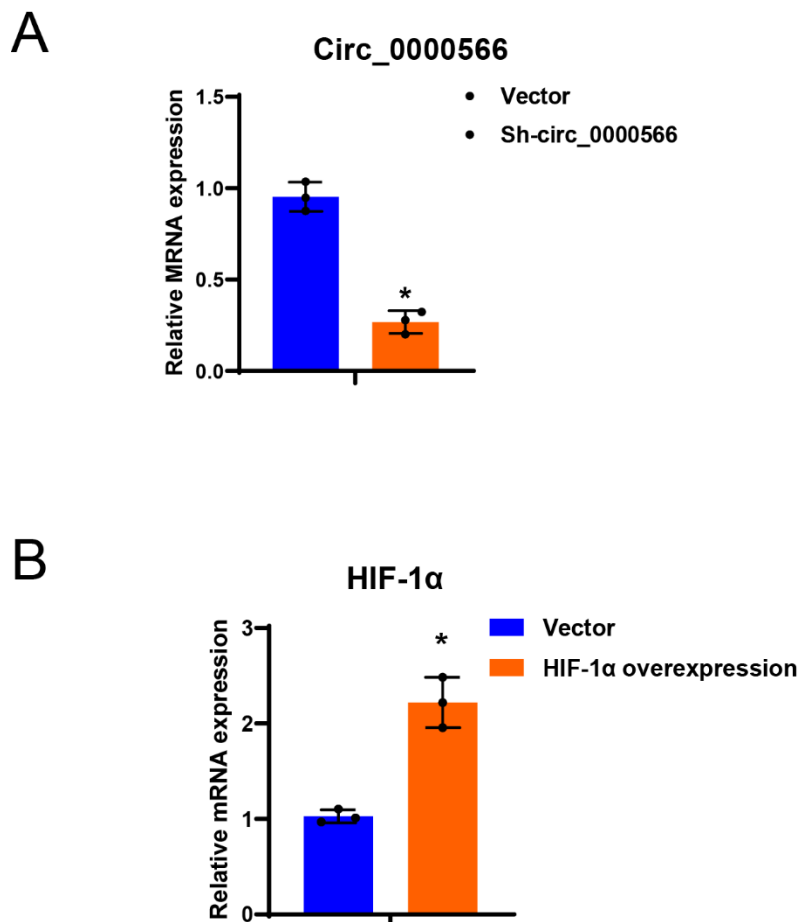

**Supplementary Figure 6. The knockdown efficiency of sh-hsa\_circ\_0000566 and the overexpression efficiency of HIF-1 $\alpha$ .** A. The expression levels of hsa\_circ\_0000566 in osteosarcoma cells transfected with sh-hsa\_circ\_0000566 were detected by qRT-PCR. Data were shown as mean  $\pm$  SD. \* $p < 0.05$ . (n=3). B. The expression levels of HIF-1  $\alpha$  in osteosarcoma cells transfected with HIF-1  $\alpha$  overexpression were detected by qRT-PCR. Data were shown as mean  $\pm$  SD. \* $p < 0.05$ . (n=3).
